# Supplementary material for: Treatment Patterns, Costs, and Survival among Medicare-Enrolled Elderly Patients Diagnosed with Advanced Stage Gastric Cancer: Analysis of a Linked Population-Based Cancer Registry and Administrative Claims Database
Source: PubMed Central journal article supplement — J Gastric Cancer. 2015 Jun 30;15(2):87–104. doi: 10.5230/jgc.2015.15.2.87 (PMC4496446; doi:10.5230/jgc.2015.15.2.87), 2015-06-30

## APPENDIX 2. Kaplan-Meier Survival Estimates by Age Group, Sex, Stage, Race, and Treatment

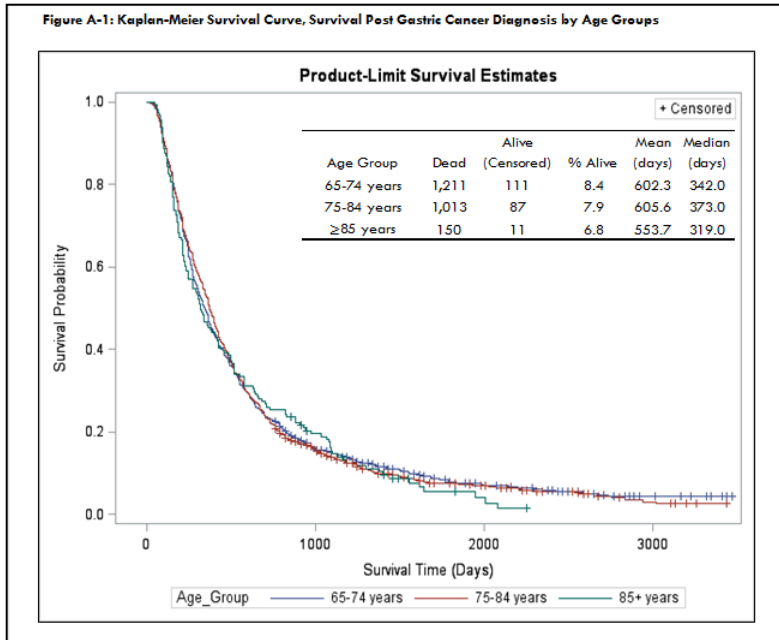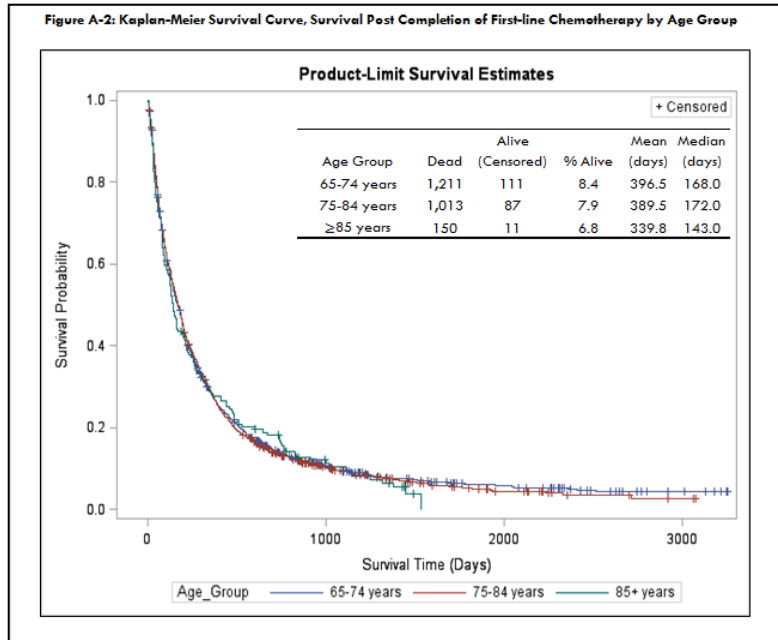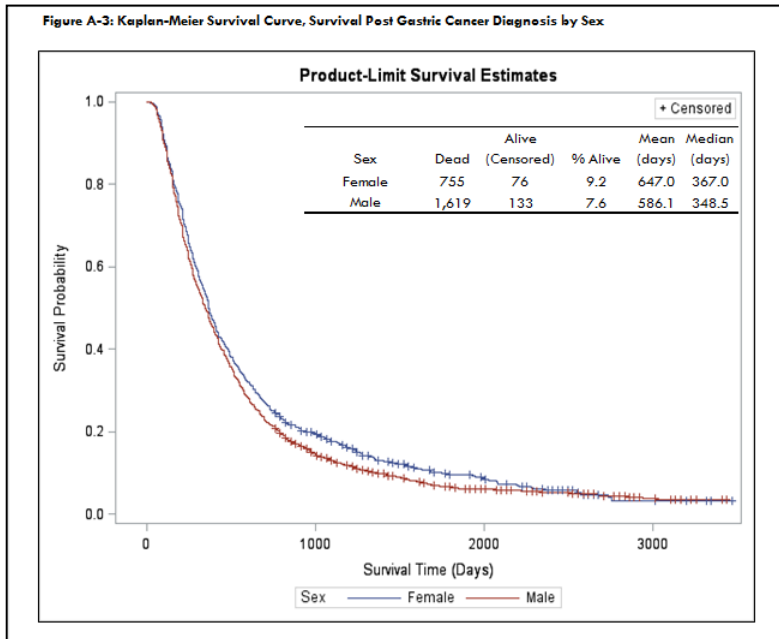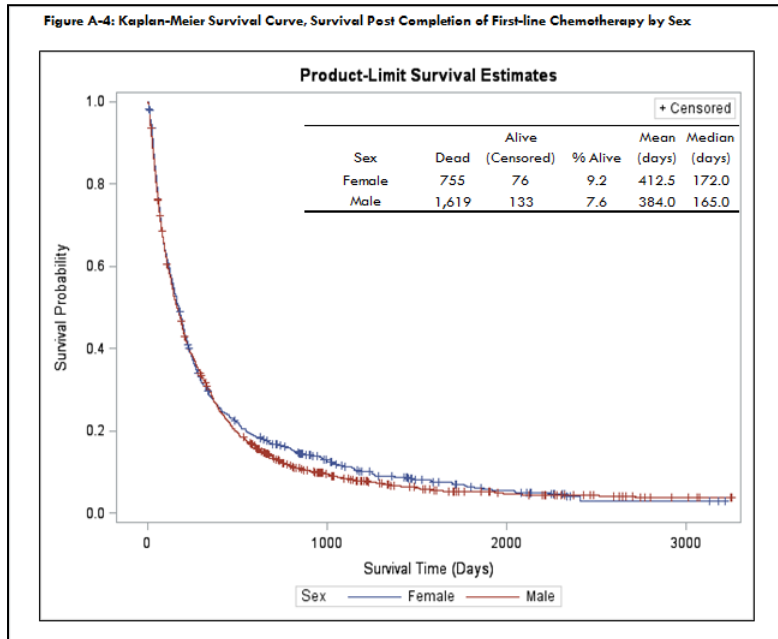

Figure A-5: Kaplan-Meier Survival Curve, Survival Post Gastric Cancer Diagnosis by Stage at Diagnosis

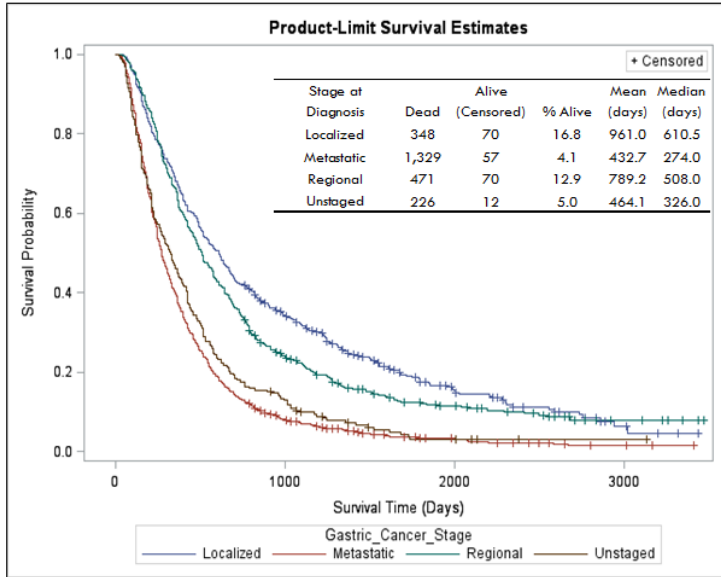

Figure A-6: Kaplan-Meier Survival Curve, Survival Post Completion of First-line Chemotherapy by Stage

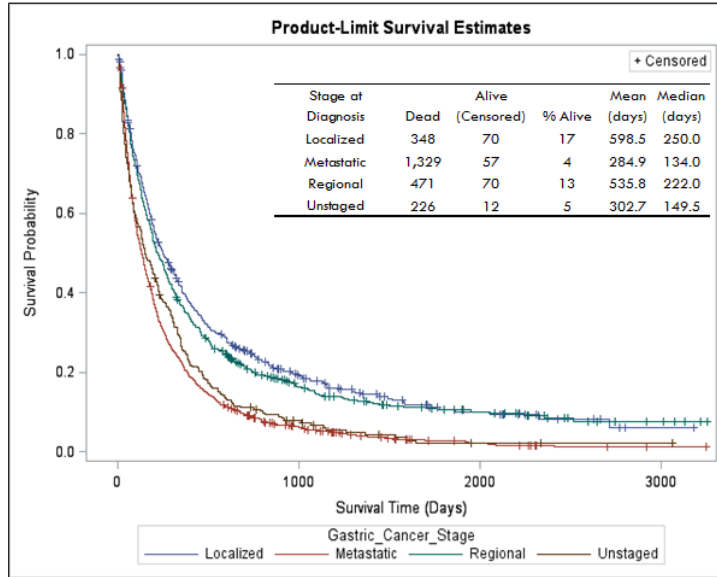

Figure A-7: Kaplan-Meier Survival Curve, Survival Post Gastric Cancer Diagnosis by Race

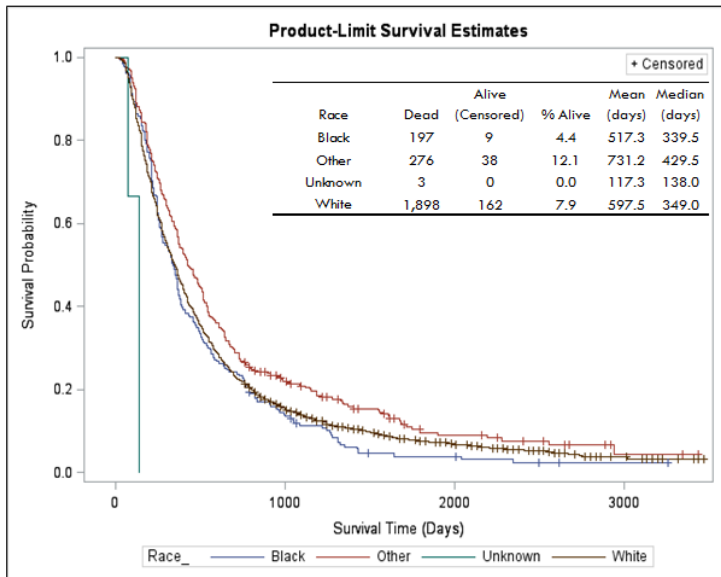

Figure A-8: Kaplan-Meier Survival Curve, Survival Post Completion of First-line Chemotherapy by Race

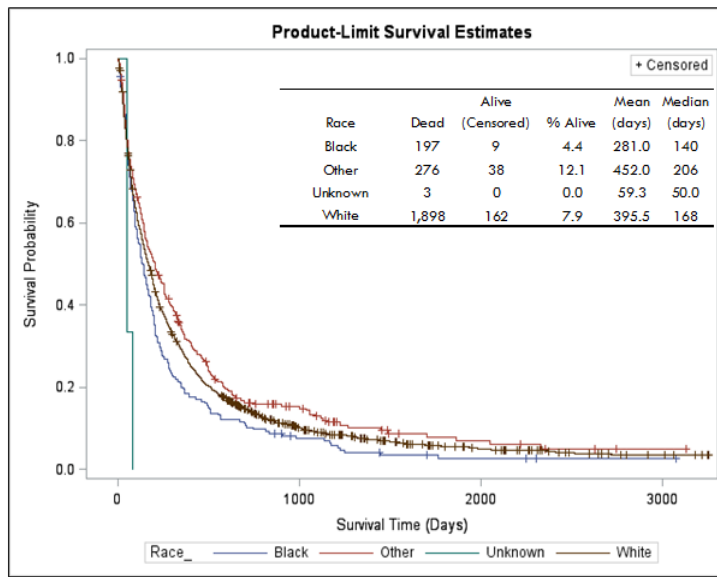

Figure A-9: Kaplan-Meier Survival Curve, Survival Post Completion of First-line Chemotherapy by Treatment

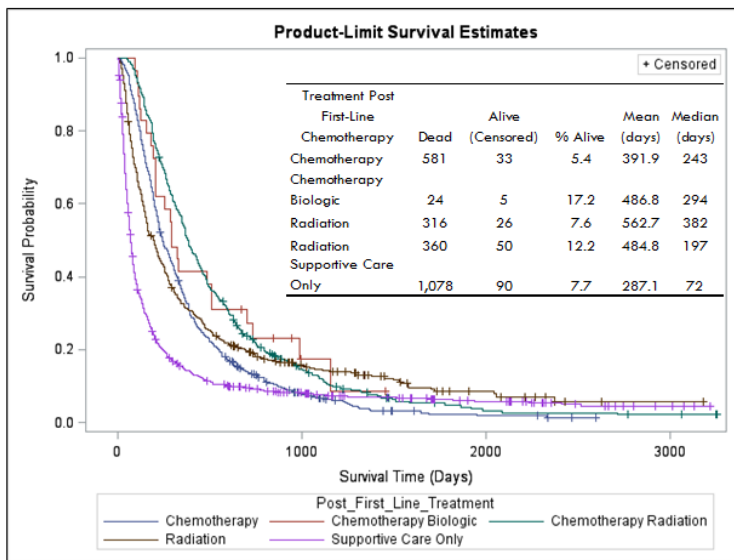

Supplement: jgc-15-87-s002.pdf [file jgc-15-87-s002.pdf]
