# Supplementary material for: Treatment Patterns, Costs, and Survival among Medicare-Enrolled Elderly Patients Diagnosed with Advanced Stage Gastric Cancer: Analysis of a Linked Population-Based Cancer Registry and Administrative Claims Database
Source: PubMed Central journal article supplement — J Gastric Cancer. 2015 Jun 30;15(2):87–104. doi: 10.5230/jgc.2015.15.2.87 (PMC4496446; doi:10.5230/jgc.2015.15.2.87), 2015-06-30
Supplement: jgc-15-87-s003.pdf [file jgc-15-87-s003.pdf]

APPENDIX 3

| Appendix 3: Supportive Care Utilization Patterns - Overall and by Treatment Cohort and Line of Therapy |                                                                              |                                                         |                                                |                                                 |                                                         |                                              |
|--------------------------------------------------------------------------------------------------------|------------------------------------------------------------------------------|---------------------------------------------------------|------------------------------------------------|-------------------------------------------------|---------------------------------------------------------|----------------------------------------------|
| Characteristic                                                                                         | Overall Cohort                                                               | Additionally Treated[b]                                 |                                                |                                                 | Supportive Care Only[b]                                 |                                              |
|                                                                                                        | Periods Of Gastric Cancer-related Supportive Care Utilization Assessment [c] |                                                         |                                                |                                                 |                                                         |                                              |
|                                                                                                        | Overall Follow-up<br>(N = 2583)<br>n (%)                                     | All Post-first-line Chemotherapy<br>(N = 1415)<br>n (%) | First-line Chemotherapy<br>(N = 1415)<br>n (%) | Second-line Chemotherapy<br>(N = 1415)<br>n (%) | All Post-first-line Chemotherapy<br>(N = 1168)<br>n (%) | First-line Chemotherapy<br>(N=1168)<br>n (%) |
| <b>Post-index Prevalence of Supportive or Palliative Medications</b>                                   |                                                                              |                                                         |                                                |                                                 |                                                         |                                              |
| <b>Palliative Surgery</b>                                                                              |                                                                              |                                                         |                                                |                                                 |                                                         |                                              |
| Had ≥1 claim, N (%)                                                                                    | 41 (2)                                                                       | 31 (2)                                                  | 3 (0)                                          | 25 (2)                                          | 6 (1)                                                   | 2 (0)                                        |
| <i>Number of claims</i>                                                                                |                                                                              |                                                         |                                                |                                                 |                                                         |                                              |
| Mean                                                                                                   | 0.0                                                                          | 0.0                                                     | 0.0                                            | 0.0                                             | 0.0                                                     | 0.0                                          |
| SD                                                                                                     | 0.2                                                                          | 0.2                                                     | 0.0                                            | 0.2                                             | 0.1                                                     | 0.0                                          |
| <b>Growth Factors</b>                                                                                  |                                                                              |                                                         |                                                |                                                 |                                                         |                                              |
| Had ≥1 claim, N (%)                                                                                    | 1704 (66)                                                                    | 903 (64)                                                | 735 (52)                                       | 790 (56)                                        | 397 (34)                                                | 567 (49)                                     |
| <i>Number of claims</i>                                                                                |                                                                              |                                                         |                                                |                                                 |                                                         |                                              |
| Mean                                                                                                   | 8.2                                                                          | 7.7                                                     | 3.4                                            | 4.0                                             | 1.5                                                     | 3.1                                          |
| SD                                                                                                     | 14.8                                                                         | 14.4                                                    | 6.4                                            | 8.8                                             | 6.2                                                     | 6.5                                          |
| Median                                                                                                 | 3                                                                            | 2                                                       | 1                                              | 1                                               | 0                                                       | 0                                            |
| <b>Granulocyte colony-stimulating factors</b>                                                          |                                                                              |                                                         |                                                |                                                 |                                                         |                                              |
| Had ≥1 claim, N (%)                                                                                    | 838 (32)                                                                     | 471 (33)                                                | 322 (23)                                       | 360 (25)                                        | 149 (13)                                                | 214 (18)                                     |
| <i>Number of claims</i>                                                                                |                                                                              |                                                         |                                                |                                                 |                                                         |                                              |
| Mean                                                                                                   | 2.7                                                                          | 2.7                                                     | 1.3                                            | 1.4                                             | 0.3                                                     | 1.0                                          |

| <b>Appendix 3: Supportive Care Utilization Patterns - Overall and by Treatment Cohort and Line of Therapy</b> |                                                                                     |                                                             |                                                    |                                                     |                                                             |                                                  |
|---------------------------------------------------------------------------------------------------------------|-------------------------------------------------------------------------------------|-------------------------------------------------------------|----------------------------------------------------|-----------------------------------------------------|-------------------------------------------------------------|--------------------------------------------------|
| <b>Characteristic</b>                                                                                         | <b>Overall Cohort</b>                                                               | <b>Additionally Treated[b]</b>                              |                                                    |                                                     | <b>Supportive Care Only[b]</b>                              |                                                  |
|                                                                                                               | <b>Periods Of Gastric Cancer-related Supportive Care Utilization Assessment [c]</b> |                                                             |                                                    |                                                     |                                                             |                                                  |
|                                                                                                               | <b>Overall Follow-up (N = 2583)</b><br>n (%)                                        | <b>All Post-first-line Chemotherapy (N = 1415)</b><br>n (%) | <b>First-line Chemotherapy (N = 1415)</b><br>n (%) | <b>Second-line Chemotherapy (N = 1415)</b><br>n (%) | <b>All Post-first-line Chemotherapy (N = 1168)</b><br>n (%) | <b>First-line Chemotherapy (N=1168)</b><br>n (%) |
| SD                                                                                                            | 8.5                                                                                 | 8.8                                                         | 4.1                                                | 6.4                                                 | 1.0                                                         | 4.0                                              |
| Median                                                                                                        | 0                                                                                   | 0                                                           | 0                                                  | 0                                                   | 0                                                           | 0                                                |
| <b>Erythropoietin-stimulating agents</b>                                                                      |                                                                                     |                                                             |                                                    |                                                     |                                                             |                                                  |
| Had ≥1 claim, N (%)                                                                                           | 1541 (60)                                                                           | 804 (57)                                                    | 640 (45)                                           | 683 (48)                                            | 329 (28)                                                    | 515 (44)                                         |
| <i>Number of claims</i>                                                                                       |                                                                                     |                                                             |                                                    |                                                     |                                                             |                                                  |
| Mean                                                                                                          | 5.9                                                                                 | 5.4                                                         | 2.3                                                | 2.8                                                 | 1.3                                                         | 2.3                                              |
| SD                                                                                                            | 10.9                                                                                | 10.1                                                        | 4.4                                                | 5.6                                                 | 6.1                                                         | 4.8                                              |
| Median                                                                                                        | 1                                                                                   | 1                                                           | 0                                                  | 0                                                   | 0                                                           | 0                                                |
| <b>Iron Therapy</b>                                                                                           |                                                                                     |                                                             |                                                    |                                                     |                                                             |                                                  |
| Had ≥1 claim, N (%)                                                                                           | 164 (6)                                                                             | 58 (4)                                                      | 49 (3)                                             | 37 (3)                                              | 18 (2)                                                      | 61 (5)                                           |
| <i>Number of claims</i>                                                                                       |                                                                                     |                                                             |                                                    |                                                     |                                                             |                                                  |
| Mean                                                                                                          | 0.3                                                                                 | 0.2                                                         | 0.1                                                | 0.1                                                 | 0.1                                                         | 0.2                                              |
| SD                                                                                                            | 2.1                                                                                 | 1.5                                                         | 1.1                                                | 1.1                                                 | 1.9                                                         | 1.2                                              |
| Median                                                                                                        | 0                                                                                   | 0                                                           | 0                                                  | 0                                                   | 0                                                           | 0                                                |
| <b>Antibiotics</b>                                                                                            |                                                                                     |                                                             |                                                    |                                                     |                                                             |                                                  |
| Had ≥1 claim, N (%)                                                                                           | 736 (28)                                                                            | 310 (22)                                                    | 220 (16)                                           | 190 (13)                                            | 132 (11)                                                    | 190 (16)                                         |
| <i>Number of claims</i>                                                                                       |                                                                                     |                                                             |                                                    |                                                     |                                                             |                                                  |
| Mean                                                                                                          | 0.7                                                                                 | 0.5                                                         | 0.2                                                | 0.3                                                 | 0.4                                                         | 0.3                                              |
| SD                                                                                                            | 2.3                                                                                 | 1.6                                                         | 0.7                                                | 1.1                                                 | 2.4                                                         | 1.0                                              |
| Median                                                                                                        | 0                                                                                   | 0                                                           | 0                                                  | 0                                                   | 0                                                           | 0                                                |
| <b>Antivirals</b>                                                                                             |                                                                                     |                                                             |                                                    |                                                     |                                                             |                                                  |
| Had ≥1 claim, N (%)                                                                                           | 34 (1)                                                                              | 19 (1)                                                      | 4 (0)                                              | 12 (1)                                              | 9 (1)                                                       | 6 (1)                                            |

| <b>Appendix 3: Supportive Care Utilization Patterns - Overall and by Treatment Cohort and Line of Therapy</b> |                                                                                     |                                                             |                                                    |                                                     |                                                             |                                                  |
|---------------------------------------------------------------------------------------------------------------|-------------------------------------------------------------------------------------|-------------------------------------------------------------|----------------------------------------------------|-----------------------------------------------------|-------------------------------------------------------------|--------------------------------------------------|
| <b>Characteristic</b>                                                                                         | <b>Overall Cohort</b>                                                               | <b>Additionally Treated[b]</b>                              |                                                    |                                                     | <b>Supportive Care Only[b]</b>                              |                                                  |
|                                                                                                               | <b>Periods Of Gastric Cancer-related Supportive Care Utilization Assessment [c]</b> |                                                             |                                                    |                                                     |                                                             |                                                  |
|                                                                                                               | <b>Overall Follow-up (N = 2583)</b><br>n (%)                                        | <b>All Post-first-line Chemotherapy (N = 1415)</b><br>n (%) | <b>First-line Chemotherapy (N = 1415)</b><br>n (%) | <b>Second-line Chemotherapy (N = 1415)</b><br>n (%) | <b>All Post-first-line Chemotherapy (N = 1168)</b><br>n (%) | <b>First-line Chemotherapy (N=1168)</b><br>n (%) |
| <i>Number of claims</i>                                                                                       |                                                                                     |                                                             |                                                    |                                                     |                                                             |                                                  |
| Mean                                                                                                          | 0.0                                                                                 | 0.0                                                         | 0.0                                                | 0.0                                                 | 0.0                                                         | 0.0                                              |
| SD                                                                                                            | 0.3                                                                                 | 0.2                                                         | 0.1                                                | 0.2                                                 | 0.1                                                         | 0.2                                              |
| Median                                                                                                        | 0                                                                                   | 0                                                           | 0                                                  | 0                                                   | 0                                                           | 0                                                |
| <b>Antiemetics</b>                                                                                            |                                                                                     |                                                             |                                                    |                                                     |                                                             |                                                  |
| Had ≥1 claim, N (%)                                                                                           | 2215 (86)                                                                           | 1043 (74)                                                   | 1127 (80)                                          | 969 (68)                                            | 186 (16)                                                    | 897 (77)                                         |
| <i>Number of claims</i>                                                                                       |                                                                                     |                                                             |                                                    |                                                     |                                                             |                                                  |
| Mean                                                                                                          | 8.6                                                                                 | 6.7                                                         | 5.0                                                | 3.6                                                 | 0.3                                                         | 4.6                                              |
| SD                                                                                                            | 11.5                                                                                | 10.8                                                        | 5.9                                                | 5.7                                                 | 1.1                                                         | 7.1                                              |
| Median                                                                                                        | 5                                                                                   | 3                                                           | 3                                                  | 2                                                   | 0                                                           | 2.5                                              |
| <b>Antifungals</b>                                                                                            |                                                                                     |                                                             |                                                    |                                                     |                                                             |                                                  |
| Had ≥1 claim, N (%)                                                                                           | 62 (2)                                                                              | 30 (2)                                                      | 16 (1)                                             | 16 (1)                                              | 13 (1)                                                      | 10 (1)                                           |
| <i>Number of claims</i>                                                                                       |                                                                                     |                                                             |                                                    |                                                     |                                                             |                                                  |
| Mean                                                                                                          | 0.0                                                                                 | 0.0                                                         | 0.0                                                | 0.0                                                 | 0.0                                                         | 0.0                                              |
| SD                                                                                                            | 0.3                                                                                 | 0.2                                                         | 0.1                                                | 0.2                                                 | 0.1                                                         | 0.2                                              |
| Median                                                                                                        | 0                                                                                   | 0                                                           | 0                                                  | 0                                                   | 0                                                           | 0                                                |
| <b>Pain Medications</b>                                                                                       |                                                                                     |                                                             |                                                    |                                                     |                                                             |                                                  |
| Had ≥1 claim, N (%)                                                                                           | 1286 (50)                                                                           | 514 (36)                                                    | 541 (38)                                           | 353 (25)                                            | 200 (17)                                                    | 407 (35)                                         |
| <i>Number of claims</i>                                                                                       |                                                                                     |                                                             |                                                    |                                                     |                                                             |                                                  |
| Mean                                                                                                          | 1.7                                                                                 | 1.4                                                         | 0.7                                                | 0.7                                                 | 0.5                                                         | 0.7                                              |
| SD                                                                                                            | 4.0                                                                                 | 4.0                                                         | 1.4                                                | 2.4                                                 | 2.0                                                         | 1.8                                              |
| Median                                                                                                        | 0                                                                                   | 0                                                           | 0                                                  | 0                                                   | 0                                                           | 0                                                |

| <b>Appendix 3: Supportive Care Utilization Patterns - Overall and by Treatment Cohort and Line of Therapy</b> |                                                                                     |                                                                  |                                                         |                                                          |                                                                  |                                                       |
|---------------------------------------------------------------------------------------------------------------|-------------------------------------------------------------------------------------|------------------------------------------------------------------|---------------------------------------------------------|----------------------------------------------------------|------------------------------------------------------------------|-------------------------------------------------------|
| <b>Characteristic</b>                                                                                         | <b>Overall Cohort</b>                                                               | <b>Additionally Treated[b]</b>                                   |                                                         |                                                          | <b>Supportive Care Only[b]</b>                                   |                                                       |
|                                                                                                               | <b>Periods Of Gastric Cancer-related Supportive Care Utilization Assessment [c]</b> |                                                                  |                                                         |                                                          |                                                                  |                                                       |
|                                                                                                               | <b>Overall Follow-up<br/>(N = 2583)<br/>n (%)</b>                                   | <b>All Post-first-line Chemotherapy<br/>(N = 1415)<br/>n (%)</b> | <b>First-line Chemotherapy<br/>(N = 1415)<br/>n (%)</b> | <b>Second-line Chemotherapy<br/>(N = 1415)<br/>n (%)</b> | <b>All Post-first-line Chemotherapy<br/>(N = 1168)<br/>n (%)</b> | <b>First-line Chemotherapy<br/>(N=1168)<br/>n (%)</b> |
| <b><i>Index Date Pre-2007, (N)</i></b>                                                                        | (N=2214)                                                                            | (N=1201)                                                         | (N=1201)                                                | (N=1201)                                                 | (N=1013)                                                         | (N=1013)                                              |
| Had ≥1 claim, N (%)                                                                                           | 1007 (45)                                                                           | 399 (33)                                                         | 413 (34)                                                | 275 (23)                                                 | 144 (14)                                                         | 310 (31)                                              |
| <i>Number of claims</i>                                                                                       |                                                                                     |                                                                  |                                                         |                                                          |                                                                  |                                                       |
| Mean                                                                                                          | 1.4                                                                                 | 1.1                                                              | 0.6                                                     | 0.6                                                      | 0.4                                                              | 0.6                                                   |
| SD                                                                                                            | 3.3                                                                                 | 3.4                                                              | 1.1                                                     | 2.3                                                      | 1.9                                                              | 1.7                                                   |
| Median                                                                                                        | 0                                                                                   | 0                                                                | 0                                                       | 0                                                        | 0                                                                | 0                                                     |
| <b><i>Index Date 2007 or later, (N)</i></b>                                                                   | (N=369)                                                                             | (N=214)                                                          | (N=214)                                                 | (N=214)                                                  | (N=155)                                                          | (N=155)                                               |
| Had ≥1 claim, N (%)                                                                                           | 279 (76)                                                                            | 115 (54)                                                         | 128 (60)                                                | 78 (36)                                                  | 56 (36)                                                          | 97 (63)                                               |
| <i>Number of claims</i>                                                                                       |                                                                                     |                                                                  |                                                         |                                                          |                                                                  |                                                       |
| Mean                                                                                                          | 3.7                                                                                 | 2.9                                                              | 1.5                                                     | 1.3                                                      | 1.1                                                              | 1.5                                                   |
| SD                                                                                                            | 6.5                                                                                 | 6.2                                                              | 2.2                                                     | 2.7                                                      | 2.4                                                              | 2.4                                                   |
| Median                                                                                                        | 2                                                                                   | 1                                                                | 1                                                       | 0                                                        | 0                                                                | 1                                                     |
| <b>Bisphosphonate</b>                                                                                         |                                                                                     |                                                                  |                                                         |                                                          |                                                                  |                                                       |
| Had ≥1 claim, N (%)                                                                                           | 279 (76)                                                                            | 115 (54)                                                         | 39 (3)                                                  | 59 (4)                                                   | 56 (36)                                                          | 20 (2)                                                |
| <i>Number of claims</i>                                                                                       |                                                                                     |                                                                  |                                                         |                                                          |                                                                  |                                                       |
| Mean                                                                                                          | 0.3                                                                                 | 0.4                                                              | 0.1                                                     | 0.2                                                      | 0.1                                                              | 0.1                                                   |
| SD                                                                                                            | 2.5                                                                                 | 2.4                                                              | 0.8                                                     | 1.4                                                      | 1.2                                                              | 0.9                                                   |
| Median                                                                                                        | 0                                                                                   | 0                                                                | 0                                                       | 0                                                        | 0                                                                | 0                                                     |
| <b>Nutritional Support</b>                                                                                    |                                                                                     |                                                                  |                                                         |                                                          |                                                                  |                                                       |
| Had ≥1 claim, N (%)                                                                                           | 139 (5)                                                                             | 90 (6)                                                           | 205 (14)                                                | 206 (15)                                                 | 22 (2)                                                           | 192 (16)                                              |
| <i>Number of claims</i>                                                                                       |                                                                                     |                                                                  |                                                         |                                                          |                                                                  |                                                       |
| Mean                                                                                                          | 1.1                                                                                 | 0.9                                                              | 0.4                                                     | 0.6                                                      | 0.4                                                              | 0.5                                                   |

| <b>Appendix 3: Supportive Care Utilization Patterns - Overall and by Treatment Cohort and Line of Therapy</b> |                                                                                     |                                                             |                                                    |                                                     |                                                             |                                                  |
|---------------------------------------------------------------------------------------------------------------|-------------------------------------------------------------------------------------|-------------------------------------------------------------|----------------------------------------------------|-----------------------------------------------------|-------------------------------------------------------------|--------------------------------------------------|
| <b>Characteristic</b>                                                                                         | <b>Overall Cohort</b>                                                               | <b>Additionally Treated[b]</b>                              |                                                    |                                                     | <b>Supportive Care Only[b]</b>                              |                                                  |
|                                                                                                               | <b>Periods Of Gastric Cancer-related Supportive Care Utilization Assessment [c]</b> |                                                             |                                                    |                                                     |                                                             |                                                  |
|                                                                                                               | <b>Overall Follow-up (N = 2583)</b><br>n (%)                                        | <b>All Post-first-line Chemotherapy (N = 1415)</b><br>n (%) | <b>First-line Chemotherapy (N = 1415)</b><br>n (%) | <b>Second-line Chemotherapy (N = 1415)</b><br>n (%) | <b>All Post-first-line Chemotherapy (N = 1168)</b><br>n (%) | <b>First-line Chemotherapy (N=1168)</b><br>n (%) |
| SD                                                                                                            | 3.7                                                                                 | 2.8                                                         | 1.6                                                | 2.0                                                 | 3.2                                                         | 1.7                                              |
| Median                                                                                                        | 0                                                                                   | 0                                                           | 0                                                  | 0                                                   | 0                                                           | 0                                                |
| <b>PET</b>                                                                                                    |                                                                                     |                                                             |                                                    |                                                     |                                                             |                                                  |
| Had ≥1 claim, N (%)                                                                                           | 570 (22)                                                                            | 260 (18)                                                    | 168 (12)                                           | 57 (4)                                              | 126 (11)                                                    | 77 (7)                                           |
| <i>Number of claims</i>                                                                                       |                                                                                     |                                                             |                                                    |                                                     |                                                             |                                                  |
| Mean                                                                                                          | 0.2                                                                                 | 0.1                                                         | 0.1                                                | 0.1                                                 | 0.0                                                         | 0.1                                              |
| SD                                                                                                            | 0.6                                                                                 | 0.4                                                         | 0.4                                                | 0.3                                                 | 0.2                                                         | 0.3                                              |
| Median                                                                                                        | 0                                                                                   | 0                                                           | 0                                                  | 0                                                   | 0                                                           | 0                                                |
| <b>Endoscopy</b>                                                                                              |                                                                                     |                                                             |                                                    |                                                     |                                                             |                                                  |
| Had ≥1 claim, N (%)                                                                                           | 294 (11)                                                                            | 82 (6)                                                      | 1344 (95)                                          | 555 (39)                                            | 19 (2)                                                      | 1080 (92)                                        |
| <i>Number of claims</i>                                                                                       |                                                                                     |                                                             |                                                    |                                                     |                                                             |                                                  |
| Mean                                                                                                          | 2.8                                                                                 | 1.4                                                         | 1.8                                                | 0.9                                                 | 0.6                                                         | 1.7                                              |
| SD                                                                                                            | 2.6                                                                                 | 2.2                                                         | 1.4                                                | 1.8                                                 | 1.6                                                         | 1.5                                              |
| Median                                                                                                        | 2                                                                                   | 1                                                           | 1                                                  | 0                                                   | 0                                                           | 1                                                |
| <b>CT</b>                                                                                                     |                                                                                     |                                                             |                                                    |                                                     |                                                             |                                                  |
| Had ≥1 claim, N (%)                                                                                           | 2491 (96)                                                                           | 774 (55)                                                    | 1299 (92)                                          | 994 (70)                                            | 328 (28)                                                    | 1063 (91)                                        |
| <i>Number of claims</i>                                                                                       |                                                                                     |                                                             |                                                    |                                                     |                                                             |                                                  |
| Mean                                                                                                          | 4.1                                                                                 | 2.9                                                         | 2.0                                                | 1.6                                                 | 1.1                                                         | 2.0                                              |
| SD                                                                                                            | 3.3                                                                                 | 2.9                                                         | 1.7                                                | 1.9                                                 | 1.8                                                         | 1.7                                              |
| Median                                                                                                        | 3                                                                                   | 2                                                           | 1                                                  | 1                                                   | 1                                                           | 1                                                |
| <b>MRI</b>                                                                                                    |                                                                                     |                                                             |                                                    |                                                     |                                                             |                                                  |
| Had ≥1 claim, N (%)                                                                                           | 2487 (96)                                                                           | 1185 (84)                                                   | 96 (7)                                             | 39 (3)                                              | 617 (53)                                                    | 67 (6)                                           |

| <b>Appendix 3: Supportive Care Utilization Patterns - Overall and by Treatment Cohort and Line of Therapy</b> |                                                                                     |                                                             |                                                    |                                                     |                                                             |                                                  |
|---------------------------------------------------------------------------------------------------------------|-------------------------------------------------------------------------------------|-------------------------------------------------------------|----------------------------------------------------|-----------------------------------------------------|-------------------------------------------------------------|--------------------------------------------------|
| <b>Characteristic</b>                                                                                         | <b>Overall Cohort</b>                                                               | <b>Additionally Treated[b]</b>                              |                                                    |                                                     | <b>Supportive Care Only[b]</b>                              |                                                  |
|                                                                                                               | <b>Periods Of Gastric Cancer-related Supportive Care Utilization Assessment [c]</b> |                                                             |                                                    |                                                     |                                                             |                                                  |
|                                                                                                               | <b>Overall Follow-up (N = 2583)</b><br>n (%)                                        | <b>All Post-first-line Chemotherapy (N = 1415)</b><br>n (%) | <b>First-line Chemotherapy (N = 1415)</b><br>n (%) | <b>Second-line Chemotherapy (N = 1415)</b><br>n (%) | <b>All Post-first-line Chemotherapy (N = 1168)</b><br>n (%) | <b>First-line Chemotherapy (N=1168)</b><br>n (%) |
| <i>Number of claims</i>                                                                                       |                                                                                     |                                                             |                                                    |                                                     |                                                             |                                                  |
| Mean                                                                                                          | 0.1                                                                                 | 0.1                                                         | 0.1                                                | 0.0                                                 | 0.0                                                         | 0.1                                              |
| SD                                                                                                            | 0.6                                                                                 | 0.4                                                         | 0.4                                                | 0.2                                                 | 0.3                                                         | 0.3                                              |
| Median                                                                                                        | 0                                                                                   | 0                                                           | 0                                                  | 0                                                   | 0                                                           | 0                                                |
| <b>Radiography</b>                                                                                            |                                                                                     |                                                             |                                                    |                                                     |                                                             |                                                  |
| Had ≥1 claim, N (%)                                                                                           | 237 (9)                                                                             | 65 (5)                                                      | 495 (35)                                           | 390 (28)                                            | 33 (3)                                                      | 509 (44)                                         |
| <i>Number of claims</i>                                                                                       |                                                                                     |                                                             |                                                    |                                                     |                                                             |                                                  |
| Mean                                                                                                          | 1.7                                                                                 | 1.1                                                         | 0.7                                                | 0.5                                                 | 0.8                                                         | 0.9                                              |
| SD                                                                                                            | 2.4                                                                                 | 1.8                                                         | 1.4                                                | 1.1                                                 | 1.6                                                         | 1.5                                              |
| Median                                                                                                        | 1                                                                                   | 0                                                           | 0                                                  | 0                                                   | 0                                                           | 0                                                |
| <b>Blood Test</b>                                                                                             |                                                                                     |                                                             |                                                    |                                                     |                                                             |                                                  |
| Had ≥1 claim, N (%)                                                                                           | 1591 (62)                                                                           | 645 (46)                                                    | 1358 (96)                                          | 1275 (90)                                           | 416 (36)                                                    | 1085 (93)                                        |
| <i>Number of claims</i>                                                                                       |                                                                                     |                                                             |                                                    |                                                     |                                                             |                                                  |
| Mean                                                                                                          | 20.8                                                                                | 17.5                                                        | 9.3                                                | 9.6                                                 | 4.7                                                         | 9.0                                              |
| SD                                                                                                            | 21.7                                                                                | 20.3                                                        | 9.0                                                | 12.3                                                | 10.3                                                        | 10.4                                             |
| Median                                                                                                        | 14                                                                                  | 12                                                          | 7                                                  | 6                                                   | 2                                                           | 6                                                |

SD = standard deviation; PET = positron emission tomography; CT = computed tomography; MRI = magnetic resonance imaging  
Granulocyte-colony stimulating factors included filgrastim, pegfilgrastim, and sargramostim; erythropoietin-stimulating agents included erythropoietin and darbepoetin.  
[a] Gastric cancer-related supportive care costs include palliative surgery, growth factors, iron supplements, antibiotics, antivirals, antiemetics, antifungals, pain medications, bisphosphonates, nutritional support, positron emission tomography, endoscopy, CT Scan, MRI, radiography, and blood tests.  
[b] Patients receiving cancer-related treatments after the first-line chemotherapy completion date were categorized as “additionally

| <b>Appendix 3: Supportive Care Utilization Patterns - Overall and by Treatment Cohort and Line of Therapy</b>                                                                                                                                                                                                                                                                                                                                                                                                                                                                                                                                                                                                                                                                                                                                                                                                              |                                                                                     |                                                                  |                                                         |                                                          |                                                                  |                                                       |
|----------------------------------------------------------------------------------------------------------------------------------------------------------------------------------------------------------------------------------------------------------------------------------------------------------------------------------------------------------------------------------------------------------------------------------------------------------------------------------------------------------------------------------------------------------------------------------------------------------------------------------------------------------------------------------------------------------------------------------------------------------------------------------------------------------------------------------------------------------------------------------------------------------------------------|-------------------------------------------------------------------------------------|------------------------------------------------------------------|---------------------------------------------------------|----------------------------------------------------------|------------------------------------------------------------------|-------------------------------------------------------|
|                                                                                                                                                                                                                                                                                                                                                                                                                                                                                                                                                                                                                                                                                                                                                                                                                                                                                                                            | <b>Overall Cohort</b>                                                               | <b>Additionally Treated[b]</b>                                   |                                                         |                                                          | <b>Supportive Care Only[b]</b>                                   |                                                       |
|                                                                                                                                                                                                                                                                                                                                                                                                                                                                                                                                                                                                                                                                                                                                                                                                                                                                                                                            | <b>Periods Of Gastric Cancer-related Supportive Care Utilization Assessment [c]</b> |                                                                  |                                                         |                                                          |                                                                  |                                                       |
|                                                                                                                                                                                                                                                                                                                                                                                                                                                                                                                                                                                                                                                                                                                                                                                                                                                                                                                            | <b>Overall Follow-up<br/>(N = 2583)<br/>n (%)</b>                                   | <b>All Post-first-line Chemotherapy<br/>(N = 1415)<br/>n (%)</b> | <b>First-line Chemotherapy<br/>(N = 1415)<br/>n (%)</b> | <b>Second-line Chemotherapy<br/>(N = 1415)<br/>n (%)</b> | <b>All Post-first-line Chemotherapy<br/>(N = 1168)<br/>n (%)</b> | <b>First-line Chemotherapy<br/>(N=1168)<br/>n (%)</b> |
| <b>Characteristic</b>                                                                                                                                                                                                                                                                                                                                                                                                                                                                                                                                                                                                                                                                                                                                                                                                                                                                                                      |                                                                                     |                                                                  |                                                         |                                                          |                                                                  |                                                       |
| treated,” and the remaining patients were categorized as "supportive care only."                                                                                                                                                                                                                                                                                                                                                                                                                                                                                                                                                                                                                                                                                                                                                                                                                                           |                                                                                     |                                                                  |                                                         |                                                          |                                                                  |                                                       |
| [c] Gastric cancer-related treatment and supportive care costs were assessed during the following pre-defined periods of assessment: (1) Overall follow-up period: the period between the index gastric cancer diagnosis date and death or the end of the database (December 31, 2009), whichever occurred first; (2) Post-first-line chemotherapy period: the period between the day immediately following the first-line chemotherapy administration end date and death or end of the database, whichever occurred first; (3) First-line chemotherapy period: the period between the gastric cancer index date and the first-line chemotherapy regimen end date; and (4) Second-line chemotherapy period: the period between the day immediately following the first-line chemotherapy regimen end date and the last date of the second-line chemotherapy regimen among patients who initiated second-line chemotherapy. |                                                                                     |                                                                  |                                                         |                                                          |                                                                  |                                                       |
