# Supplementary material for: Treatment Patterns, Costs, and Survival among Medicare-Enrolled Elderly Patients Diagnosed with Advanced Stage Gastric Cancer: Analysis of a Linked Population-Based Cancer Registry and Administrative Claims Database
Source: PubMed Central journal article supplement — J Gastric Cancer. 2015 Jun 30;15(2):87–104. doi: 10.5230/jgc.2015.15.2.87 (PMC4496446; doi:10.5230/jgc.2015.15.2.87), 2015-06-30
Supplement: jgc-15-87-s004.pdf [file jgc-15-87-s004.pdf]

APPENDIX 4

| Appendix 4: All-cause Health Care Utilization and Costs during the Entire Follow-up Period - Overall by Treatment Cohort and Line of Therapy |                                                           |                                                         |                                                |                                                 |                                                         |                                                |
|----------------------------------------------------------------------------------------------------------------------------------------------|-----------------------------------------------------------|---------------------------------------------------------|------------------------------------------------|-------------------------------------------------|---------------------------------------------------------|------------------------------------------------|
|                                                                                                                                              | Overall Cohort                                            | Additionally Treated[a]                                 |                                                |                                                 | Supportive Care Only[a]                                 |                                                |
|                                                                                                                                              | Periods Of All-Cause Utilization and Costs Assessment [b] |                                                         |                                                |                                                 |                                                         |                                                |
|                                                                                                                                              | Overall Follow-up<br>(N = 2583)<br>n (%)                  | All Post-first-line Chemotherapy<br>(N = 1415)<br>n (%) | First-line Chemotherapy<br>(N = 1415)<br>n (%) | Second-line Chemotherapy<br>(N = 1415)<br>n (%) | All Post-first-line Chemotherapy<br>(N = 1168)<br>n (%) | First-line Chemotherapy<br>(N = 1168)<br>n (%) |
| <b>All-cause Inpatient Services</b>                                                                                                          |                                                           |                                                         |                                                |                                                 |                                                         |                                                |
| <i>Had ≥1 hospital admission, n (%)</i>                                                                                                      | 2410 (93)                                                 | 1163 (82)                                               | 924 (65)                                       | 733 (52)                                        | 846 (72)                                                | 883 (76)                                       |
| <i>Number of unique admissions</i>                                                                                                           |                                                           |                                                         |                                                |                                                 |                                                         |                                                |
| Mean                                                                                                                                         | 3                                                         | 2                                                       | 1                                              | 1                                               | 1                                                       | 2                                              |
| SD                                                                                                                                           | 2                                                         | 2                                                       | 1                                              | 2                                               | 2                                                       | 2                                              |
| Median                                                                                                                                       | 3                                                         | 2                                                       | 1                                              | 1                                               | 1                                                       | 1                                              |
| <i>Total days in hospital</i>                                                                                                                |                                                           |                                                         |                                                |                                                 |                                                         |                                                |
| Mean                                                                                                                                         | 23                                                        | 15                                                      | 9                                              | 7                                               | 10                                                      | 12                                             |
| SD                                                                                                                                           | 23                                                        | 19                                                      | 13                                             | 14                                              | 16                                                      | 15                                             |
| Median                                                                                                                                       | 16                                                        | 9                                                       | 5                                              | 1                                               | 5                                                       | 8                                              |
| <i>Total inpatient costs (2012 US \$)</i>                                                                                                    |                                                           |                                                         |                                                |                                                 |                                                         |                                                |
| Mean                                                                                                                                         | \$51,672                                                  | \$29,271                                                | \$23,223                                       | \$14,320                                        | \$20,525                                                | \$30,152                                       |
| SD                                                                                                                                           | \$50,662                                                  | \$35,907                                                | \$30,586                                       | \$25,719                                        | \$34,129                                                | \$38,148                                       |
| Median                                                                                                                                       | \$38,792                                                  | \$18,701                                                | \$12,523                                       | \$4850                                          | \$11,054                                                | \$19,435                                       |
| <b>All-cause ED Visits</b>                                                                                                                   |                                                           |                                                         |                                                |                                                 |                                                         |                                                |
| <i>Had ≥1 ED visit, n (%)</i>                                                                                                                | 2160 (84)                                                 | 1079 (76)                                               | 677 (48)                                       | 694 (49)                                        | 760 (65)                                                | 656 (56)                                       |

**Appendix 4: All-cause Health Care Utilization and Costs during the Entire Follow-up Period - Overall by Treatment Cohort and Line of Therapy**

|                                                           | Overall Cohort                                            | Additionally Treated[a]                                 |                                                |                                                 |                                                         | Supportive Care Only[a]                        |
|-----------------------------------------------------------|-----------------------------------------------------------|---------------------------------------------------------|------------------------------------------------|-------------------------------------------------|---------------------------------------------------------|------------------------------------------------|
|                                                           | Periods Of All-Cause Utilization and Costs Assessment [b] |                                                         |                                                |                                                 |                                                         |                                                |
|                                                           | Overall Follow-up<br>(N = 2583)<br>n (%)                  | All Post-first-line Chemotherapy<br>(N = 1415)<br>n (%) | First-line Chemotherapy<br>(N = 1415)<br>n (%) | Second-line Chemotherapy<br>(N = 1415)<br>n (%) | All Post-first-line Chemotherapy<br>(N = 1168)<br>n (%) | First-line Chemotherapy<br>(N = 1168)<br>n (%) |
| <i>Number of ED visits</i>                                |                                                           |                                                         |                                                |                                                 | )                                                       |                                                |
| Mean                                                      | 3                                                         | 3                                                       | 2                                              | 2                                               | 2                                                       | 2                                              |
| SD                                                        | 3                                                         | 3                                                       | 1                                              | 2                                               | 2                                                       | 2                                              |
| Median                                                    | 3                                                         | 2                                                       | 1                                              | 2                                               | 1                                                       | 1                                              |
| <i>Total ED costs (2012 US \$)</i>                        |                                                           |                                                         |                                                |                                                 |                                                         |                                                |
| Mean                                                      | \$416                                                     | \$320                                                   | \$128                                          | \$159                                           | \$205                                                   | \$171                                          |
| SD                                                        | \$468                                                     | \$392                                                   | \$214                                          | \$279                                           | \$336                                                   | \$263                                          |
| Median                                                    | \$303                                                     | \$207                                                   | \$0                                            | \$0                                             | \$146                                                   | \$98                                           |
| <b>All-cause Office or Specialist Visits</b>              |                                                           |                                                         |                                                |                                                 |                                                         |                                                |
| <i>Had ≥1 office or specialist visit, n (%)</i>           | 2581 (100)                                                | 1411 (100)                                              | 1415 (100)                                     | 1408 (100)                                      | 1087 (93)                                               | 1166 (100)                                     |
| <i>Number of office visits</i>                            |                                                           |                                                         |                                                |                                                 |                                                         |                                                |
| Mean                                                      | 66                                                        | 49                                                      | 30                                             | 29                                              | 20                                                      | 30                                             |
| SD                                                        | 58                                                        | 47                                                      | 25                                             | 33                                              | 43                                                      | 30                                             |
| Median                                                    | 48                                                        | 34                                                      | 23                                             | 18                                              | 7                                                       | 21                                             |
| <i>Total office or specialist visit costs (2012 US\$)</i> |                                                           |                                                         |                                                |                                                 |                                                         |                                                |
| Mean                                                      | \$27,843                                                  | \$21,346                                                | \$15,431                                       | \$11,727                                        | \$3813                                                  | \$13,207                                       |

**Appendix 4: All-cause Health Care Utilization and Costs during the Entire Follow-up Period - Overall by Treatment Cohort and Line of Therapy**

|                                                     | Overall Cohort                                            | Additionally Treated[a]                                 |                                                |                                                 |                                                         | Supportive Care Only[a]                        |  |
|-----------------------------------------------------|-----------------------------------------------------------|---------------------------------------------------------|------------------------------------------------|-------------------------------------------------|---------------------------------------------------------|------------------------------------------------|--|
|                                                     | Periods Of All-Cause Utilization and Costs Assessment [b] |                                                         |                                                |                                                 |                                                         |                                                |  |
|                                                     | Overall Follow-up<br>(N = 2583)<br>n (%)                  | All Post-first-line Chemotherapy<br>(N = 1415)<br>n (%) | First-line Chemotherapy<br>(N = 1415)<br>n (%) | Second-line Chemotherapy<br>(N = 1415)<br>n (%) | All Post-first-line Chemotherapy<br>(N = 1168)<br>n (%) | First-line Chemotherapy<br>(N = 1168)<br>n (%) |  |
| SD                                                  | \$32,413                                                  | \$30,370                                                | \$15,474                                       | \$14,405                                        | \$8,209                                                 | \$16,121                                       |  |
| Median                                              | \$17,104                                                  | \$10,969                                                | \$10,403                                       | \$6,416                                         | \$1,304                                                 | \$8,088                                        |  |
| <b>All-cause Hospital Outpatient Visits</b>         |                                                           |                                                         |                                                |                                                 |                                                         |                                                |  |
| <i>Had ≥1 hospital outpatient visit, n (%)</i>      | 2545 (99)                                                 | 1334 (94)                                               | 1367 (97)                                      | 1231 (87)                                       | 765 (65)                                                | 1115 (95)                                      |  |
| <i>Number of hospital outpatient visits</i>         |                                                           |                                                         |                                                |                                                 |                                                         |                                                |  |
| Mean                                                | 20                                                        | 15                                                      | 10                                             | 9                                               | 5                                                       | 9                                              |  |
| SD                                                  | 23                                                        | 21                                                      | 10                                             | 16                                              | 12                                                      | 10                                             |  |
| Median                                              | 13                                                        | 9                                                       | 7                                              | 5                                               | 1                                                       | 6                                              |  |
| <i>Total hospital outpatient costs (2012 US \$)</i> |                                                           |                                                         |                                                |                                                 |                                                         |                                                |  |
| Mean                                                | \$11,825                                                  | \$8868                                                  | \$6797                                         | \$5657                                          | \$1762                                                  | \$5411                                         |  |
| SD                                                  | \$20,485                                                  | \$19,855                                                | \$9223                                         | \$16,748                                        | \$10,797                                                | \$8347                                         |  |
| Median                                              | \$6182                                                    | \$3459                                                  | \$4070                                         | \$1800                                          | \$280                                                   | \$2755                                         |  |
| <b>All-cause Hospice Visits</b>                     |                                                           |                                                         |                                                |                                                 |                                                         |                                                |  |
| <i>Had ≥1 hospice service, n (%)</i>                | 1399 (54)                                                 | 790 (56)                                                | 4 (0)                                          | 215 (15)                                        | 608 (52)                                                | 7 (1)                                          |  |

**Appendix 4: All-cause Health Care Utilization and Costs during the Entire Follow-up Period - Overall by Treatment Cohort and Line of Therapy**

|                                          | Overall Cohort                                            | Additionally Treated[a]                                 |                                                |                                                 |                                                         | Supportive Care Only[a]                        |  |
|------------------------------------------|-----------------------------------------------------------|---------------------------------------------------------|------------------------------------------------|-------------------------------------------------|---------------------------------------------------------|------------------------------------------------|--|
|                                          | Periods Of All-Cause Utilization and Costs Assessment [b] |                                                         |                                                |                                                 |                                                         |                                                |  |
|                                          | Overall Follow-up<br>(N = 2583)<br>n (%)                  | All Post-first-line Chemotherapy<br>(N = 1415)<br>n (%) | First-line Chemotherapy<br>(N = 1415)<br>n (%) | Second-line Chemotherapy<br>(N = 1415)<br>n (%) | All Post-first-line Chemotherapy<br>(N = 1168)<br>n (%) | First-line Chemotherapy<br>(N = 1168)<br>n (%) |  |
| <i>Number of hospice visits</i>          |                                                           |                                                         |                                                |                                                 |                                                         |                                                |  |
| Mean                                     | 1                                                         | 1                                                       | 0                                              | 0                                               | 1                                                       | 0                                              |  |
| SD                                       | 2                                                         | 2                                                       | 0                                              | 1                                               | 2                                                       | 0                                              |  |
| Median                                   | 1                                                         | 1                                                       | 0                                              | 0                                               | 1                                                       | 0                                              |  |
| <i>Total hospice costs (2012 US \$)</i>  |                                                           |                                                         |                                                |                                                 |                                                         |                                                |  |
| Mean                                     | \$3578                                                    | \$3668                                                  | \$32                                           | \$1311                                          | \$3380                                                  | \$50                                           |  |
| SD                                       | \$7901                                                    | \$8082                                                  | \$766                                          | \$5551                                          | \$7355                                                  | \$918                                          |  |
| Median                                   | \$547                                                     | \$677                                                   | \$0                                            | \$0                                             | \$381                                                   | \$0                                            |  |
| <b>All-cause SNF Care</b>                |                                                           |                                                         |                                                |                                                 |                                                         |                                                |  |
| <i>Had ≥1 SNF admission, n (%)</i>       | 598 (23)                                                  | 252 (18)                                                | 101 (7)                                        | 131 (9)                                         | 182 (16)                                                | 133 (11)                                       |  |
| <i>Number of SNF admissions</i>          |                                                           |                                                         |                                                |                                                 |                                                         |                                                |  |
| Mean                                     | 0                                                         | 0                                                       | 0                                              | 0                                               | 0                                                       | 0                                              |  |
| SD                                       | 1                                                         | 1                                                       | 0                                              | 1                                               | 1                                                       | 0                                              |  |
| Median                                   | 0                                                         | 0                                                       | 0                                              | 0                                               | 0                                                       | 0                                              |  |
| <i>Total SNF care costs (2012 US \$)</i> |                                                           |                                                         |                                                |                                                 |                                                         |                                                |  |
| Mean                                     | \$2989                                                    | \$2282                                                  | \$712                                          | \$1183                                          | \$1742                                                  | \$1240                                         |  |
| SD                                       | \$7836                                                    | \$6763                                                  | \$3542                                         | \$4919                                          | \$6400                                                  | \$4633                                         |  |
| Median                                   | \$0                                                       | \$0                                                     | \$0                                            | \$0                                             | \$0                                                     | \$0                                            |  |
| <b>All-cause Outpatient</b>              |                                                           |                                                         |                                                |                                                 |                                                         |                                                |  |

**Appendix 4: All-cause Health Care Utilization and Costs during the Entire Follow-up Period - Overall by Treatment Cohort and Line of Therapy**

|                                                               | Overall Cohort                                            | Additionally Treated[a]                                 |                                                |                                                 | Supportive Care Only[a]                                 |                                                |
|---------------------------------------------------------------|-----------------------------------------------------------|---------------------------------------------------------|------------------------------------------------|-------------------------------------------------|---------------------------------------------------------|------------------------------------------------|
|                                                               | Periods Of All-Cause Utilization and Costs Assessment [b] |                                                         |                                                |                                                 |                                                         |                                                |
|                                                               | Overall Follow-up<br>(N = 2583)<br>n (%)                  | All Post-first-line Chemotherapy<br>(N = 1415)<br>n (%) | First-line Chemotherapy<br>(N = 1415)<br>n (%) | Second-line Chemotherapy<br>(N = 1415)<br>n (%) | All Post-first-line Chemotherapy<br>(N = 1168)<br>n (%) | First-line Chemotherapy<br>(N = 1168)<br>n (%) |
| <b>Pharmacy</b>                                               |                                                           |                                                         |                                                |                                                 |                                                         |                                                |
| <i>Had ≥1 outpatient pharmacy encounter, n (%)</i>            | 472 (18)                                                  | 271 (19)                                                | 152 (11)                                       | 218 (15)                                        | 178 (15)                                                | 139 (12)                                       |
| <i>Number of outpatient pharmacy encounters</i>               |                                                           |                                                         |                                                |                                                 |                                                         |                                                |
| Mean                                                          | 10                                                        | 10                                                      | 2                                              | 5                                               | 5                                                       | 3                                              |
| SD                                                            | 35                                                        | 33                                                      | 10                                             | 24                                              | 24                                                      | 16                                             |
| Median                                                        | 0                                                         | 0                                                       | 0                                              | 0                                               | 0                                                       | 0                                              |
| <i>Total outpatient pharmacy encounter costs (2012 US \$)</i> |                                                           |                                                         |                                                |                                                 |                                                         |                                                |
| Mean                                                          | \$844                                                     | \$764                                                   | \$283                                          | \$386                                           | \$331                                                   | \$266                                          |
| SD                                                            | \$5070                                                    | \$4155                                                  | \$3486                                         | \$2696                                          | \$1980                                                  | \$2059                                         |
| Median                                                        | \$0                                                       | \$0                                                     | \$0                                            | \$0                                             | \$0                                                     | \$0                                            |
| <b>All-cause Ancillary Care</b>                               |                                                           |                                                         |                                                |                                                 |                                                         |                                                |
| <i>Had ≥1 ancillary care visit, n (%)</i>                     | 2112 (82)                                                 | 1064 (75)                                               | 908 (64)                                       | 834 (59)                                        | 588 (50)                                                | 766 (66)                                       |
| <i>Number of ancillary care visits</i>                        |                                                           |                                                         |                                                |                                                 |                                                         |                                                |
| Mean                                                          | 8                                                         | 6                                                       | 3                                              | 3                                               | 3                                                       | 3                                              |
| SD                                                            | 12                                                        | 10                                                      | 5                                              | 6                                               | 8                                                       | 6                                              |
| Median                                                        | 4                                                         | 3                                                       | 1                                              | 1                                               | 1                                                       | 1                                              |
| <i>Total ancillary care costs (2012</i>                       |                                                           |                                                         |                                                |                                                 |                                                         |                                                |

**Appendix 4: All-cause Health Care Utilization and Costs during the Entire Follow-up Period - Overall by Treatment Cohort and Line of Therapy**

|                                                | Overall Cohort                                            | Additionally Treated[a]                                 |                                                |                                                 |                                                         | Supportive Care Only[a]                        |  |
|------------------------------------------------|-----------------------------------------------------------|---------------------------------------------------------|------------------------------------------------|-------------------------------------------------|---------------------------------------------------------|------------------------------------------------|--|
|                                                | Periods Of All-Cause Utilization and Costs Assessment [b] |                                                         |                                                |                                                 |                                                         |                                                |  |
|                                                | Overall Follow-up<br>(N = 2583)<br>n (%)                  | All Post-first-line Chemotherapy<br>(N = 1415)<br>n (%) | First-line Chemotherapy<br>(N = 1415)<br>n (%) | Second-line Chemotherapy<br>(N = 1415)<br>n (%) | All Post-first-line Chemotherapy<br>(N = 1168)<br>n (%) | First-line Chemotherapy<br>(N = 1168)<br>n (%) |  |
| <i>US \$)</i>                                  |                                                           |                                                         |                                                |                                                 |                                                         |                                                |  |
| Mean                                           | \$5620                                                    | \$4075                                                  | \$2277                                         | \$2326                                          | \$1874                                                  | \$2858                                         |  |
| SD                                             | \$9634                                                    | \$8221                                                  | \$4351                                         | \$5604                                          | \$6714                                                  | \$4947                                         |  |
| Median                                         | \$2824                                                    | \$1160                                                  | \$476                                          | \$197                                           | \$0                                                     | \$713                                          |  |
| <b>All-cause Total Health Care Utilization</b> |                                                           |                                                         |                                                |                                                 |                                                         |                                                |  |
| <i>Had ≥1 medical encounter, n (%)</i>         | 2583 (100)                                                | 1415 (100)                                              | 1415 (100)                                     | 1415 (100)                                      | 1149 (98)                                               | 1168 (100)                                     |  |
| <i>Number of encounters</i>                    |                                                           |                                                         |                                                |                                                 |                                                         |                                                |  |
| Mean                                           | 111                                                       | 86                                                      | 48                                             | 49                                              | 36                                                      | 49                                             |  |
| SD                                             | 99                                                        | 85                                                      | 39                                             | 64                                              | 72                                                      | 48                                             |  |
| Median                                         | 81                                                        | 59                                                      | 37                                             | 30                                              | 13                                                      | 36                                             |  |
| <i>Total costs (2012 US \$)</i>                |                                                           |                                                         |                                                |                                                 |                                                         |                                                |  |
| Mean                                           | \$104,786                                                 | \$70,594                                                | \$48,884                                       | \$37,068                                        | \$33,633                                                | \$53,355                                       |  |
| SD                                             | \$76,671                                                  | \$61,762                                                | \$41,489                                       | \$41,681                                        | \$46,869                                                | \$49,665                                       |  |
| Median                                         | \$86,288                                                  | \$53,680                                                | \$38,300                                       | \$23,890                                        | \$18,914                                                | \$41,729                                       |  |

ED = emergency department; SD = standard deviation; SNF = skilled nursing facility; US = United States

[a] Patients receiving cancer-related treatments after the first-line chemotherapy completion date were categorized as “additionally treated,” and the remaining patients were classified as “supportive care only.”

**Appendix 4: All-cause Health Care Utilization and Costs during the Entire Follow-up Period - Overall by Treatment Cohort and Line of Therapy**

|                                                                                                                                                                                                                                                                                                                                                                                                                                                                                                                                                                                                                                                                                                                                                                                                                                                                                                                                     | Overall Cohort                                            | Additionally Treated[a]                                 |                                                |                                                 | Supportive Care Only[a]                                 |                                                |
|-------------------------------------------------------------------------------------------------------------------------------------------------------------------------------------------------------------------------------------------------------------------------------------------------------------------------------------------------------------------------------------------------------------------------------------------------------------------------------------------------------------------------------------------------------------------------------------------------------------------------------------------------------------------------------------------------------------------------------------------------------------------------------------------------------------------------------------------------------------------------------------------------------------------------------------|-----------------------------------------------------------|---------------------------------------------------------|------------------------------------------------|-------------------------------------------------|---------------------------------------------------------|------------------------------------------------|
|                                                                                                                                                                                                                                                                                                                                                                                                                                                                                                                                                                                                                                                                                                                                                                                                                                                                                                                                     | Periods Of All-Cause Utilization and Costs Assessment [b] |                                                         |                                                |                                                 |                                                         |                                                |
|                                                                                                                                                                                                                                                                                                                                                                                                                                                                                                                                                                                                                                                                                                                                                                                                                                                                                                                                     | Overall Follow-up<br>(N = 2583)<br>n (%)                  | All Post-first-line Chemotherapy<br>(N = 1415)<br>n (%) | First-line Chemotherapy<br>(N = 1415)<br>n (%) | Second-line Chemotherapy<br>(N = 1415)<br>n (%) | All Post-first-line Chemotherapy<br>(N = 1168)<br>n (%) | First-line Chemotherapy<br>(N = 1168)<br>n (%) |
| <p>[b] Gastric cancer-related health care utilization and costs were assessed during the following pre-defined periods of assessment: (1) Overall follow-up period: the period between the index gastric cancer diagnosis date and death or the end of the database (December 31, 2009), whichever occurred first; (2) Post-first-line chemotherapy period: the period between the day immediately following the first-line chemotherapy administration end date and death or the end of the database, whichever occurred first; (3) First-line chemotherapy period: the period between the gastric cancer index date and the first-line chemotherapy regimen end date; and (4) Second-line chemotherapy period: the period between the day immediately following the first-line chemotherapy regimen end date and the last date of the second-line chemotherapy regimen among patients who initiated second-line chemotherapy.</p> |                                                           |                                                         |                                                |                                                 |                                                         |                                                |
